# Supplementary material for: Metagenomic Approach to Characterizing Disease Epidemiology in a Disease-Endemic Environment in Northern Thailand
Source: PubMed Central journal article supplement (PMC6399164; doi:10.3389/fmicb.2019.00319), 2019-02-26

Phylogenetic analysis of pathogens detected from NGS results (red letters). All maximum likelihood trees were created using the best fit model of nucleotide substitution in the MEGA 6 program with bootstrapping (1000 replicates).

*Leptospira* spp. (16S)  
Model: ML (K2+G)

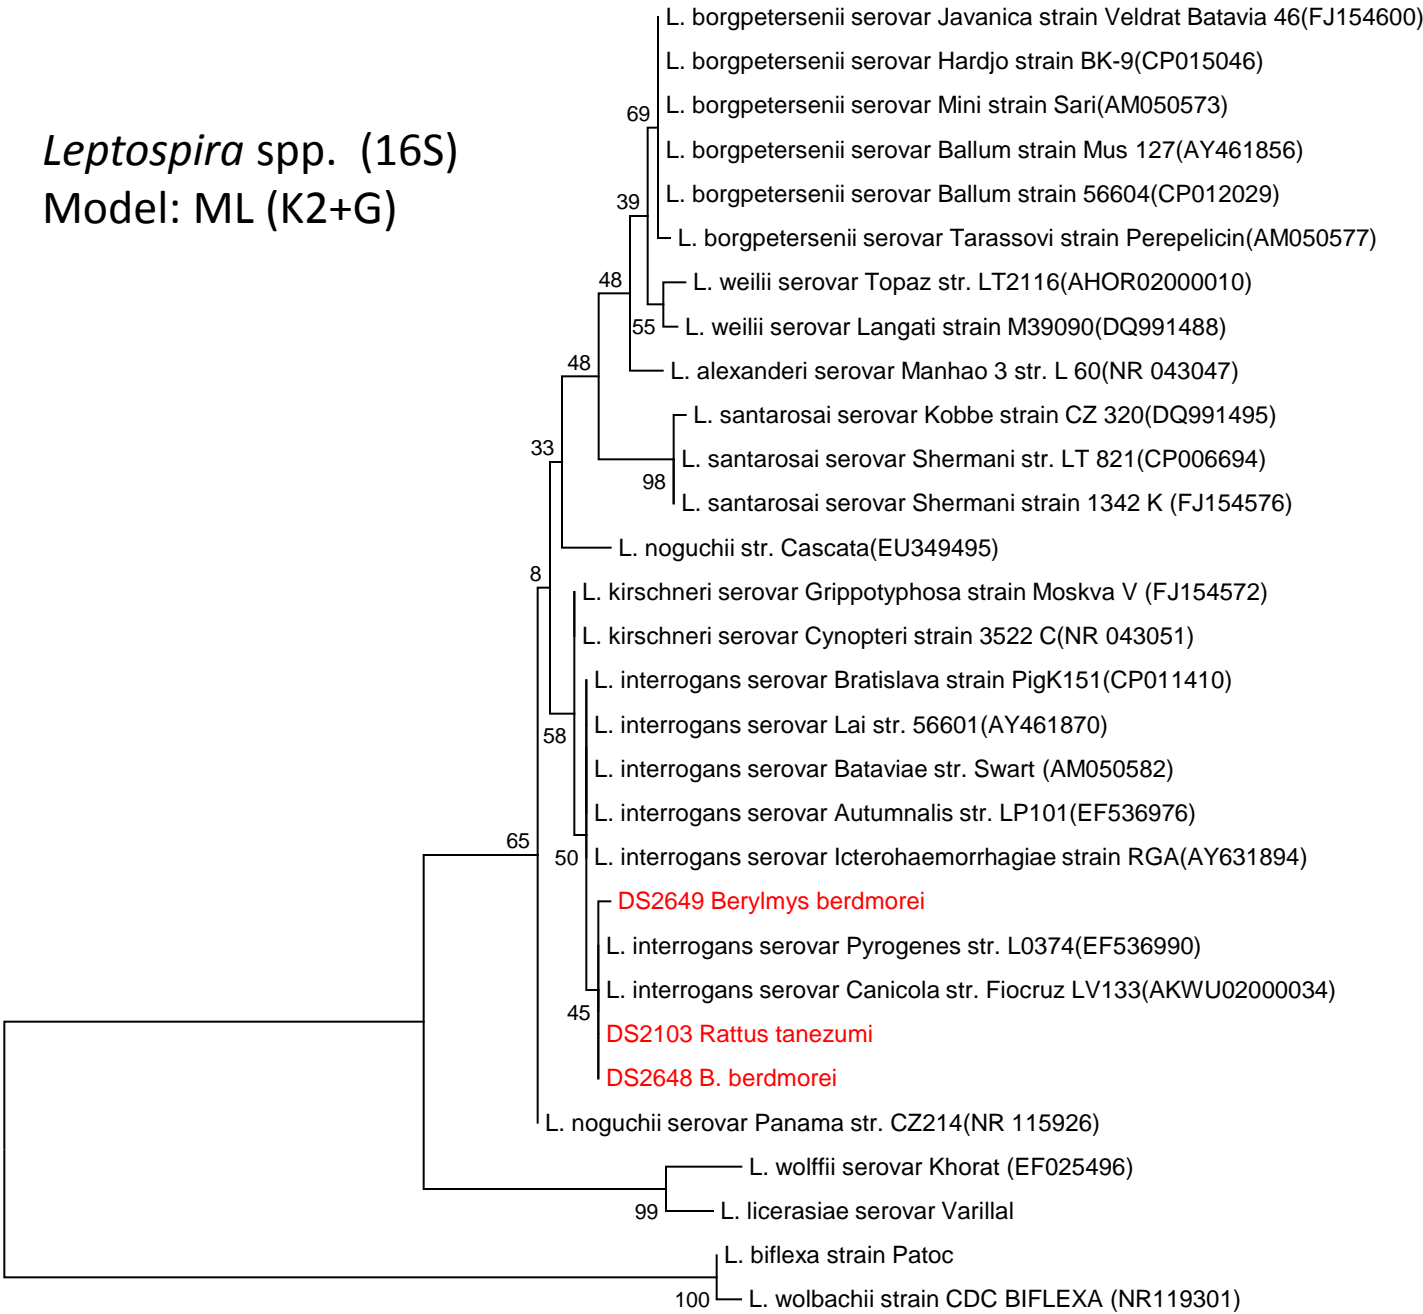

0.02

# *Leptospira* spp. (*secY*)

Model: ML(HKY+G)

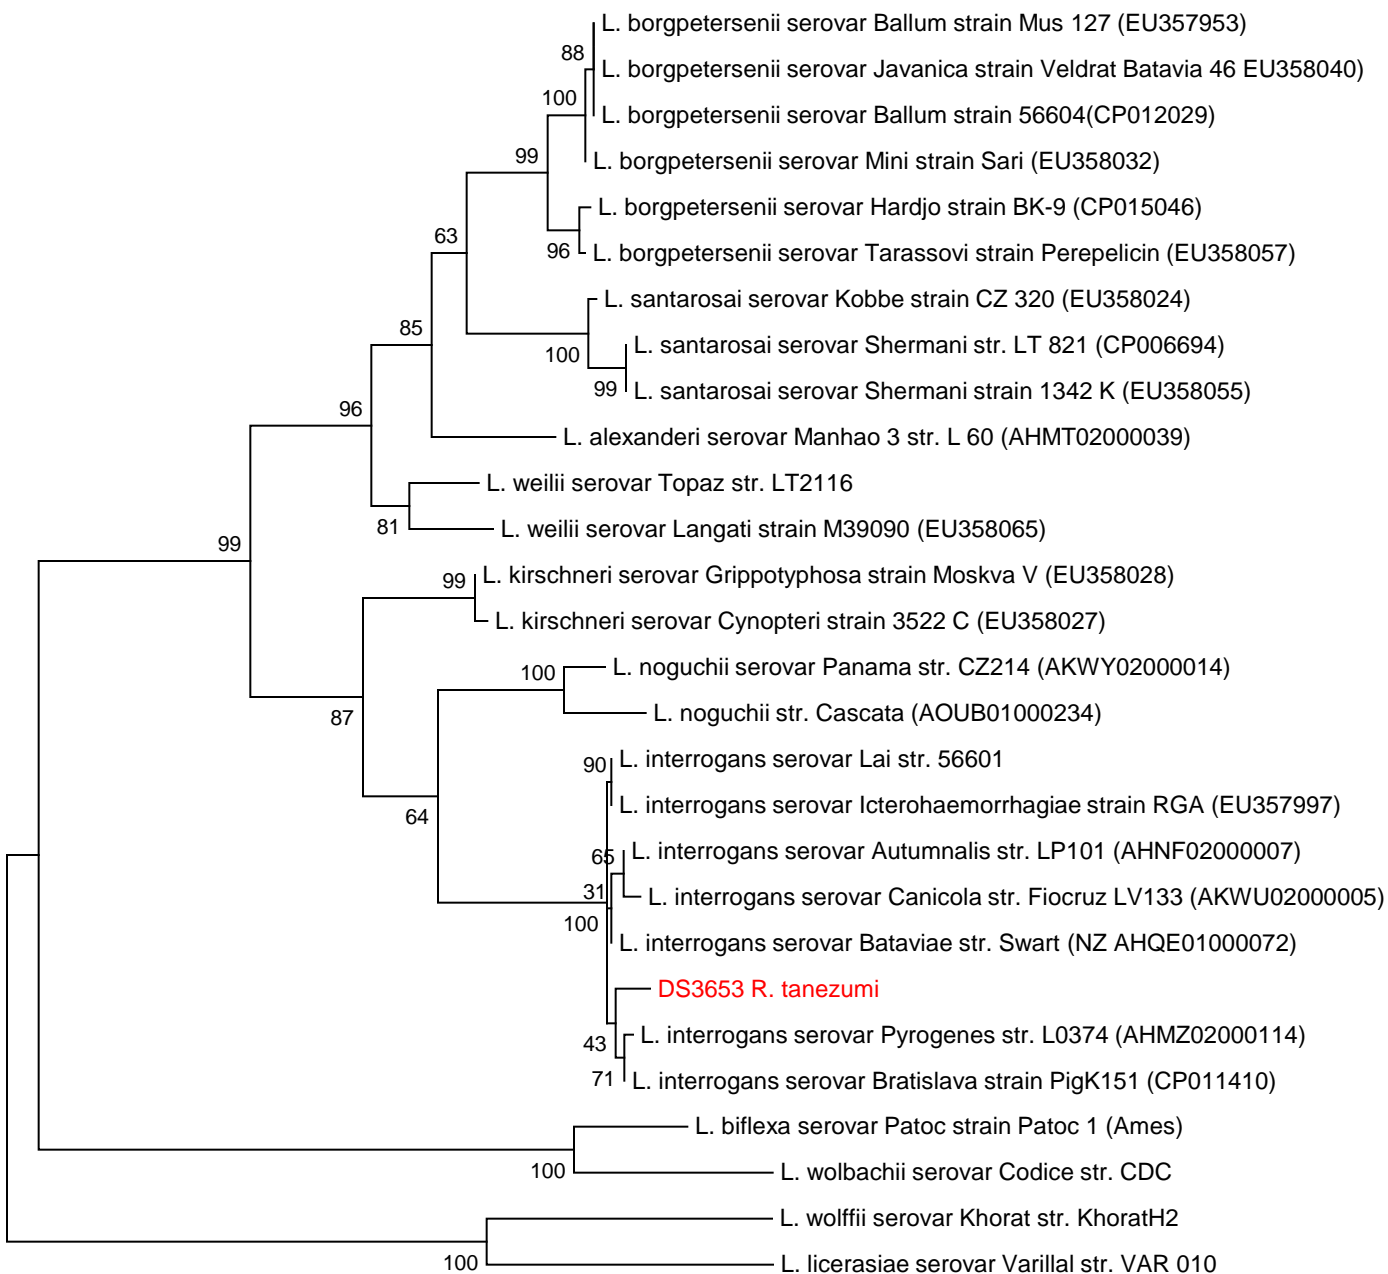

0.05

*Borrelia* spp. (16S)  
Model: ML (K2+G)

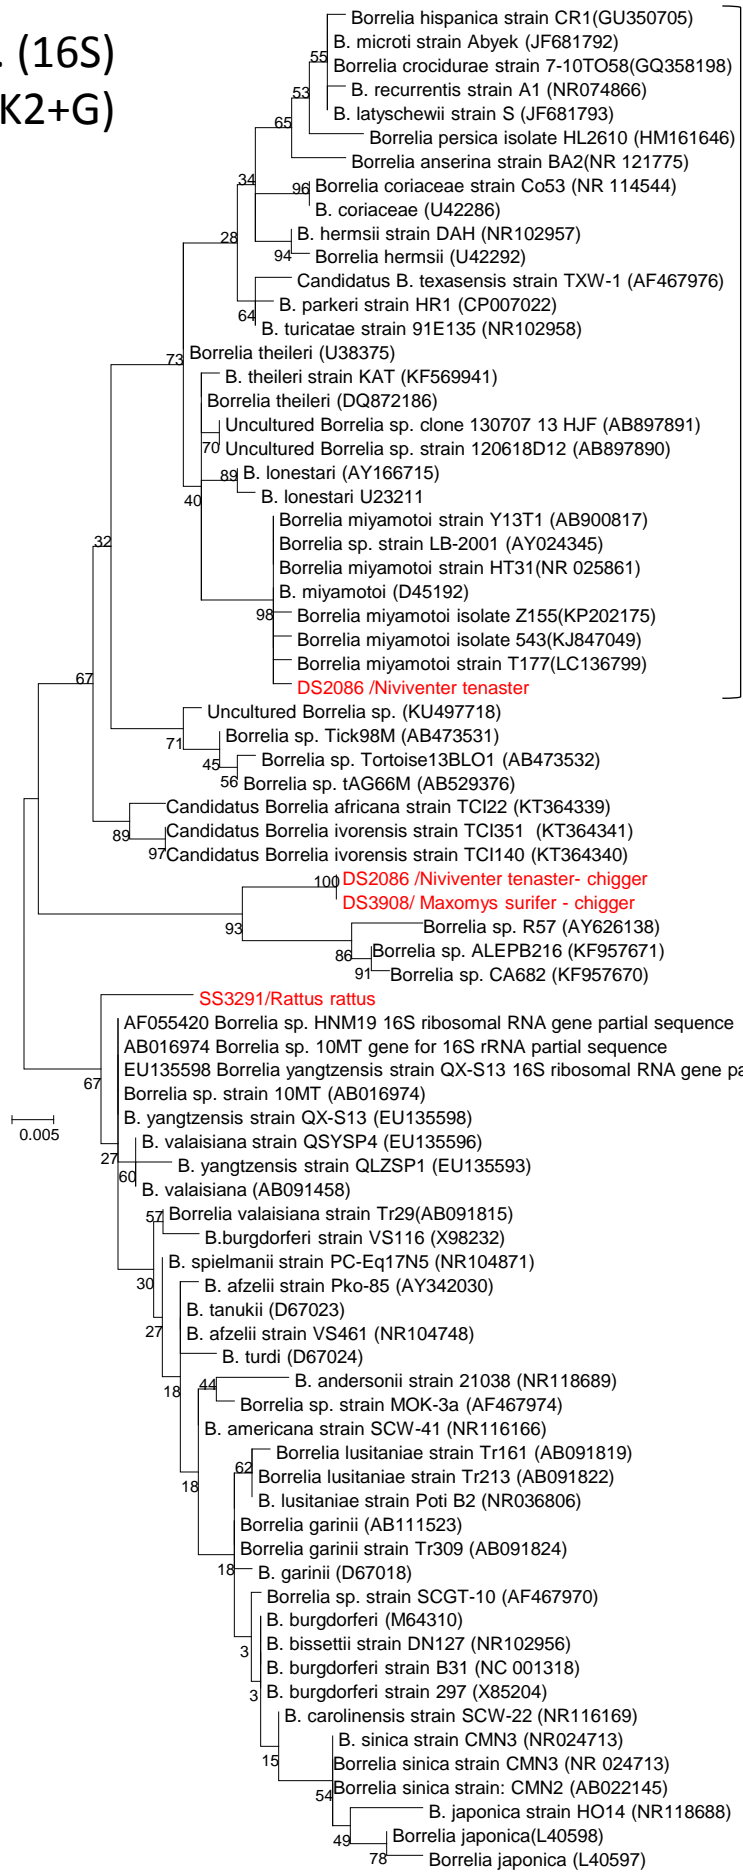

Relapsing  
Fever *Borrelia*

Lyme *Borrelia*

*Borrelia* spp. (*flaB*)  
Model: ML (T92+G)

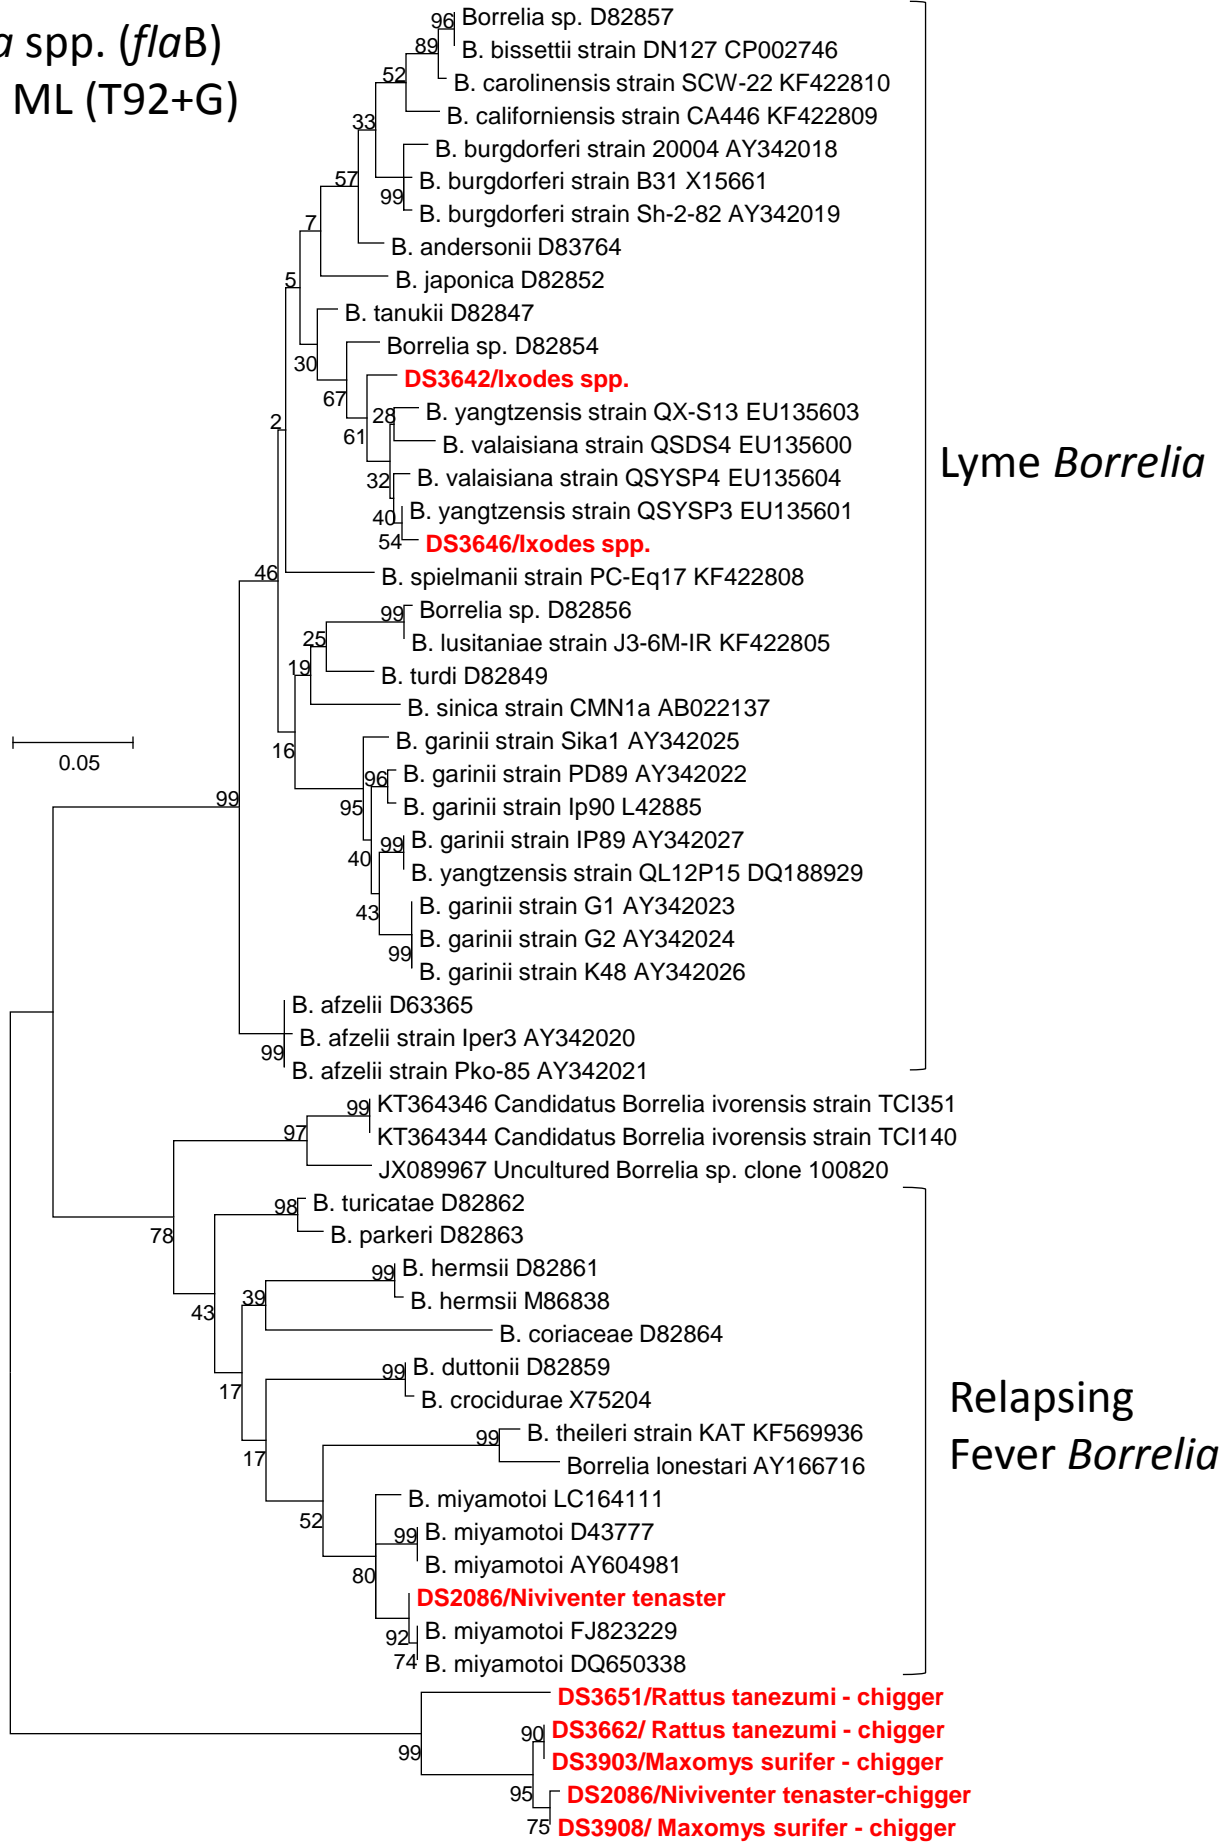

# *Coxiella* spp. (16S)

Model: ML(K2+G)

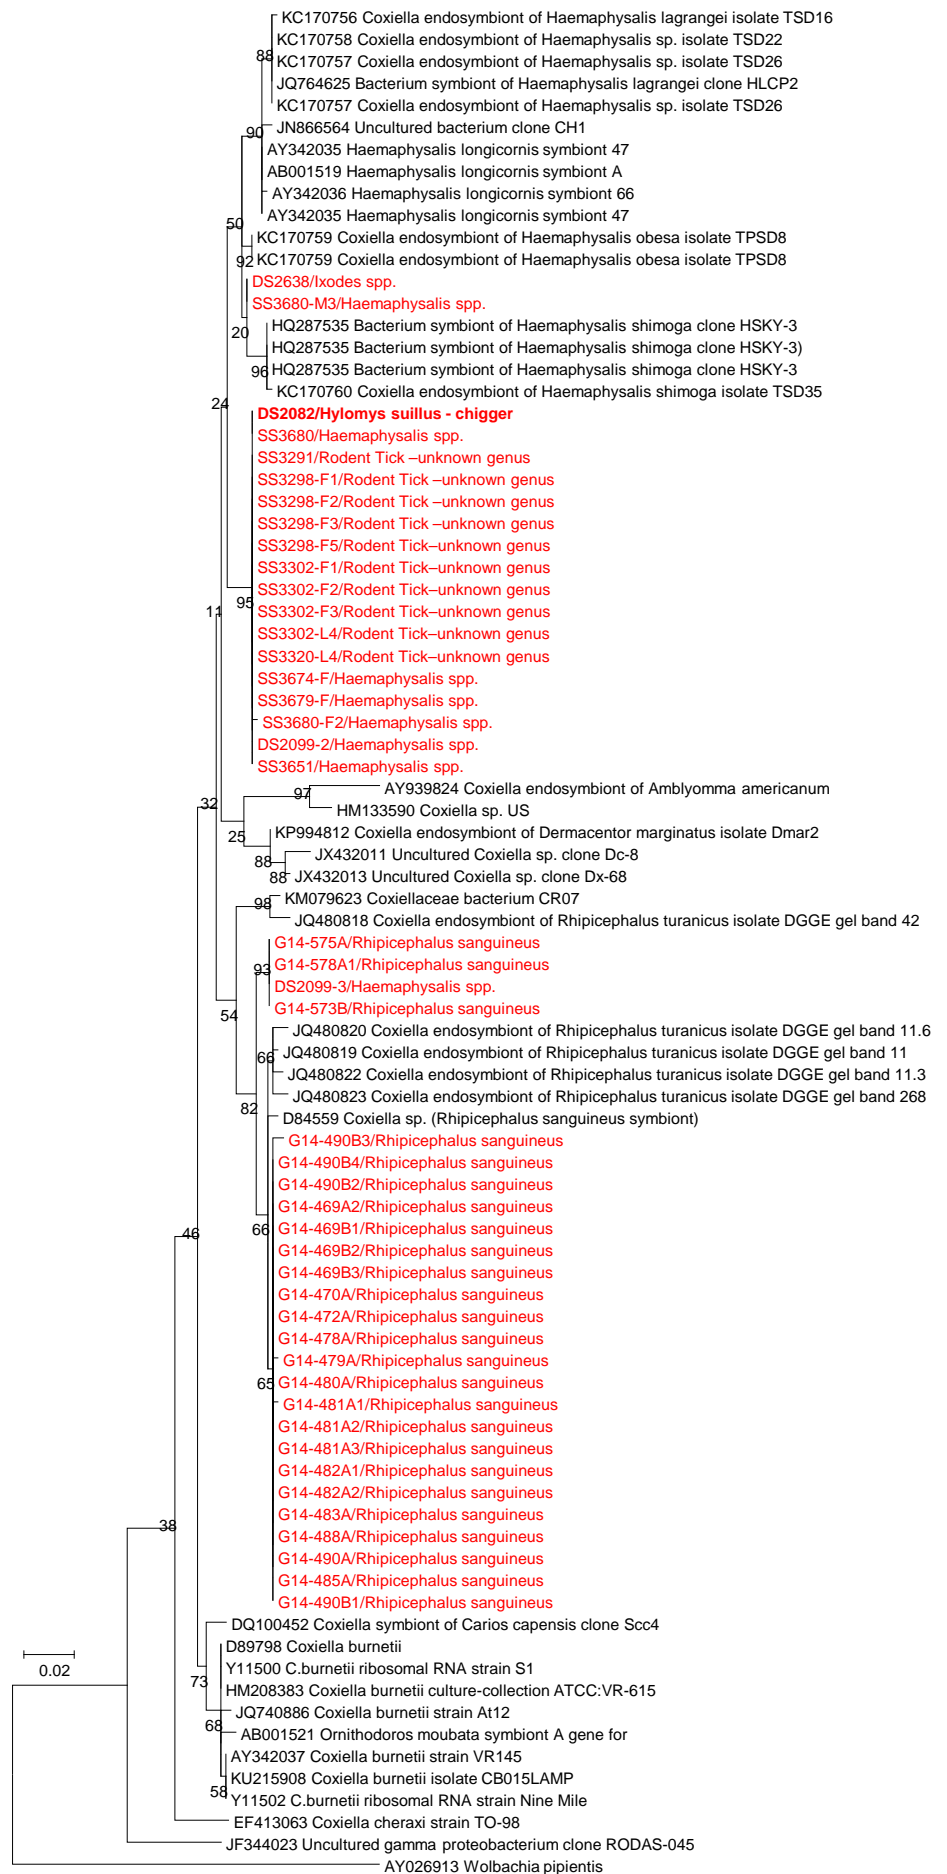

*Anaplasma* spp.

*Ehrlichia* spp

*Candidatus Neoehrlichia* spp.

*Neorickettsia* spp.

Target gene: 16S rDNA

Model: ML (K2+G)

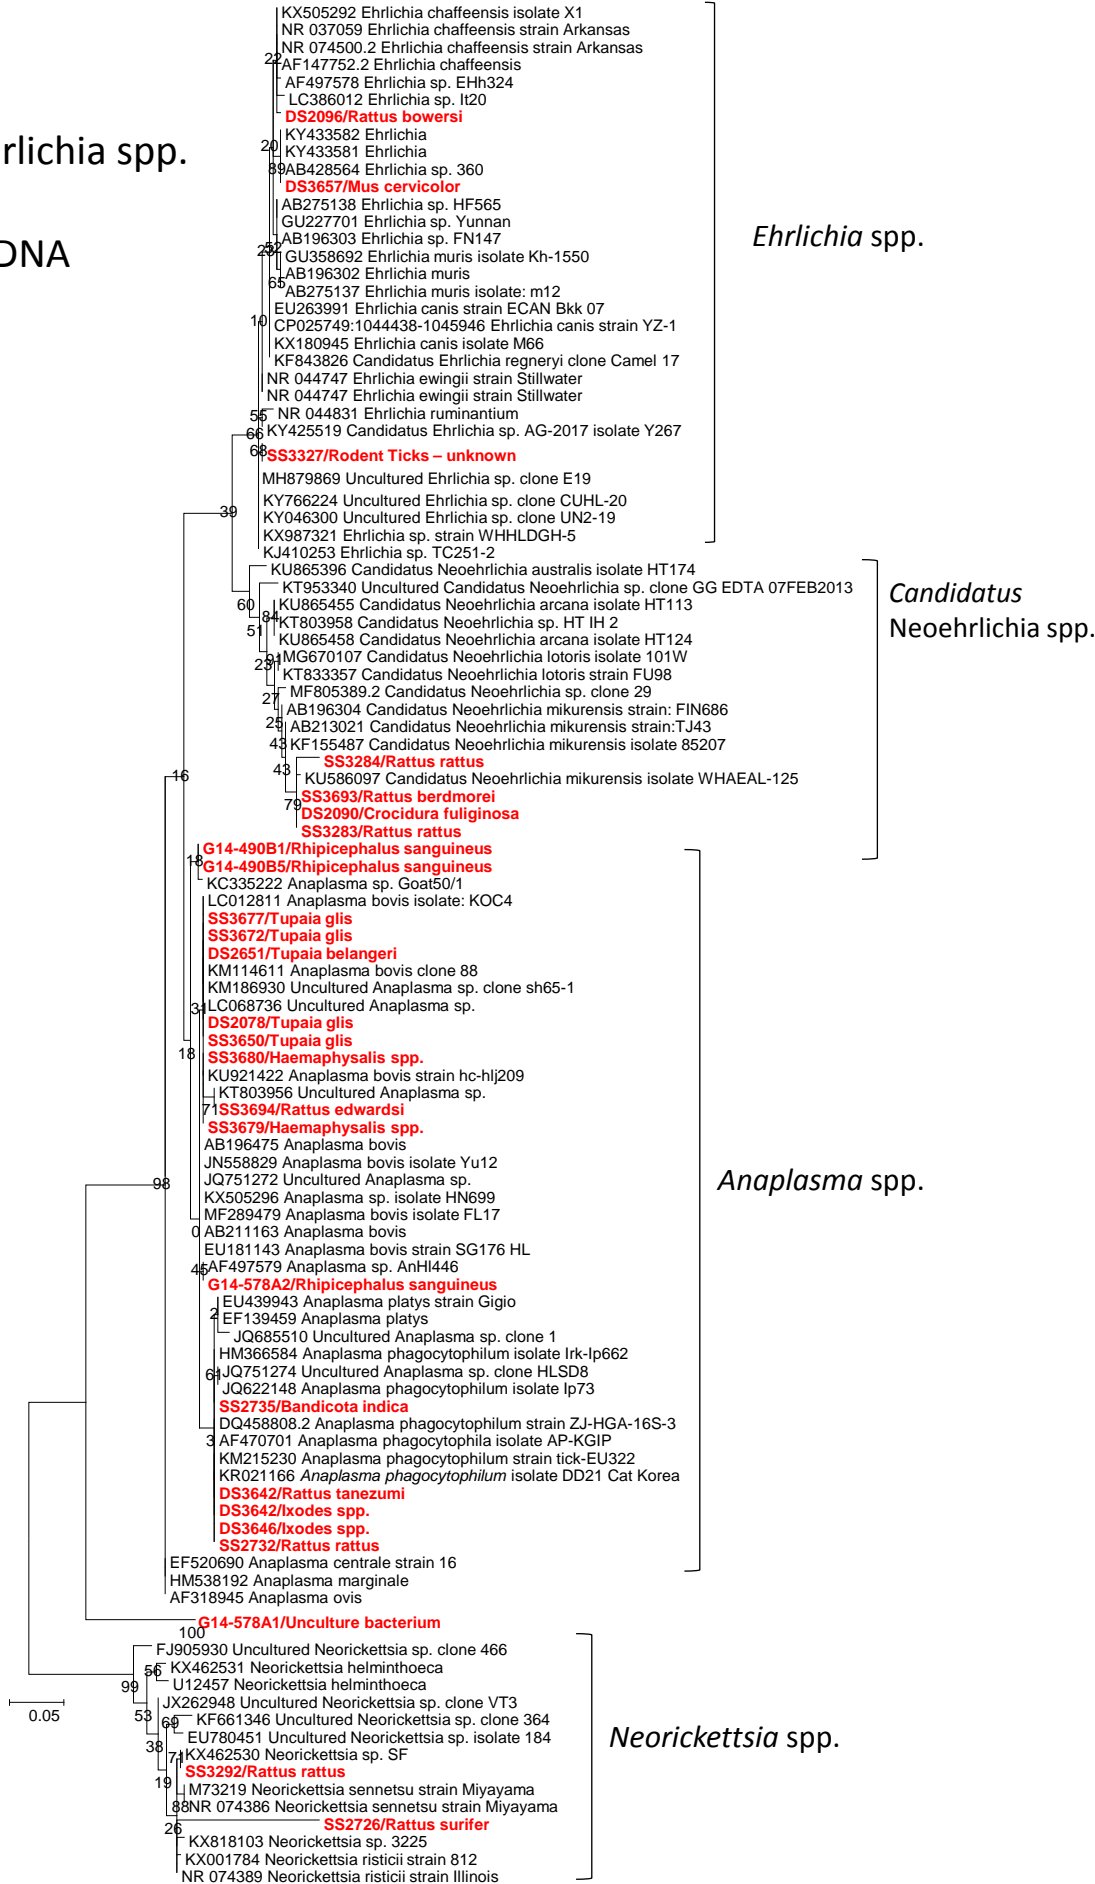

*Ehrlichia* spp.

*Candidatus Neoehrlichia* spp.

*Anaplasma* spp.

*Neorickettsia* spp.

*Anaplasma* & *Ehrlichia* spp. (groEL)

Model:T92+G

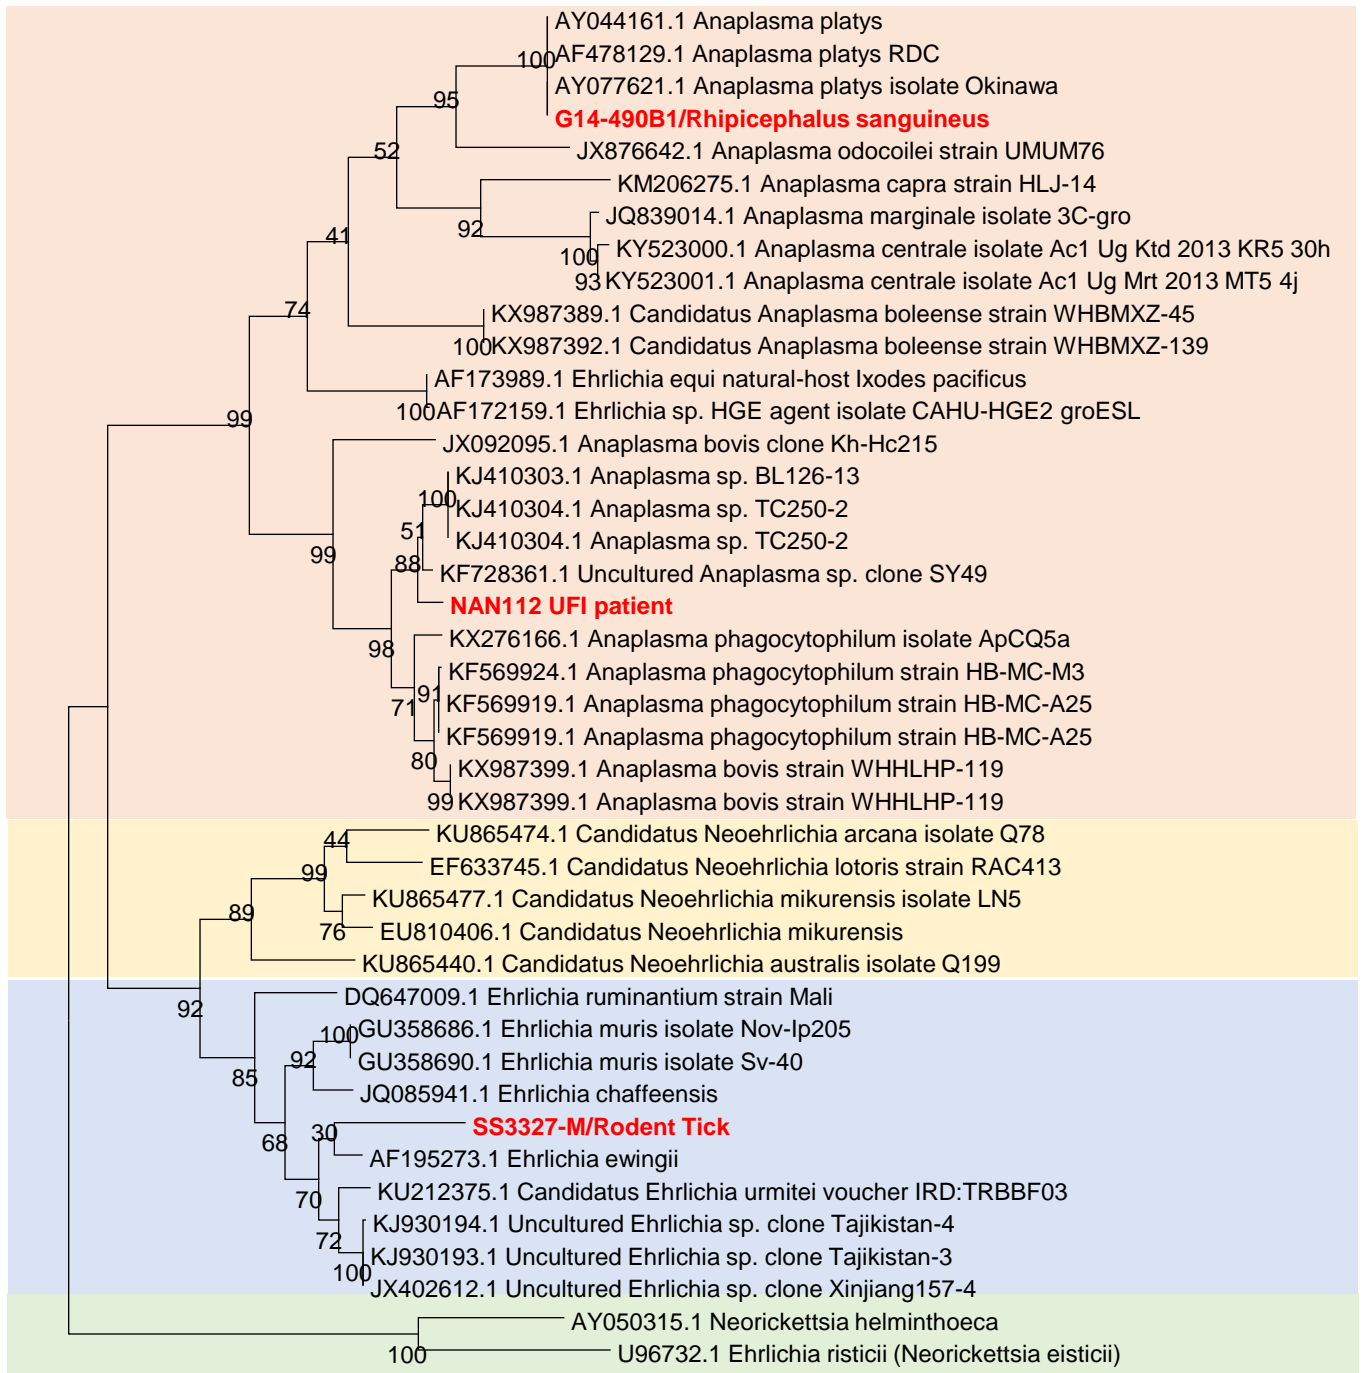

0.1

# *Bartonella* spp. (*ssrA*)

Model: ML (K2+G)

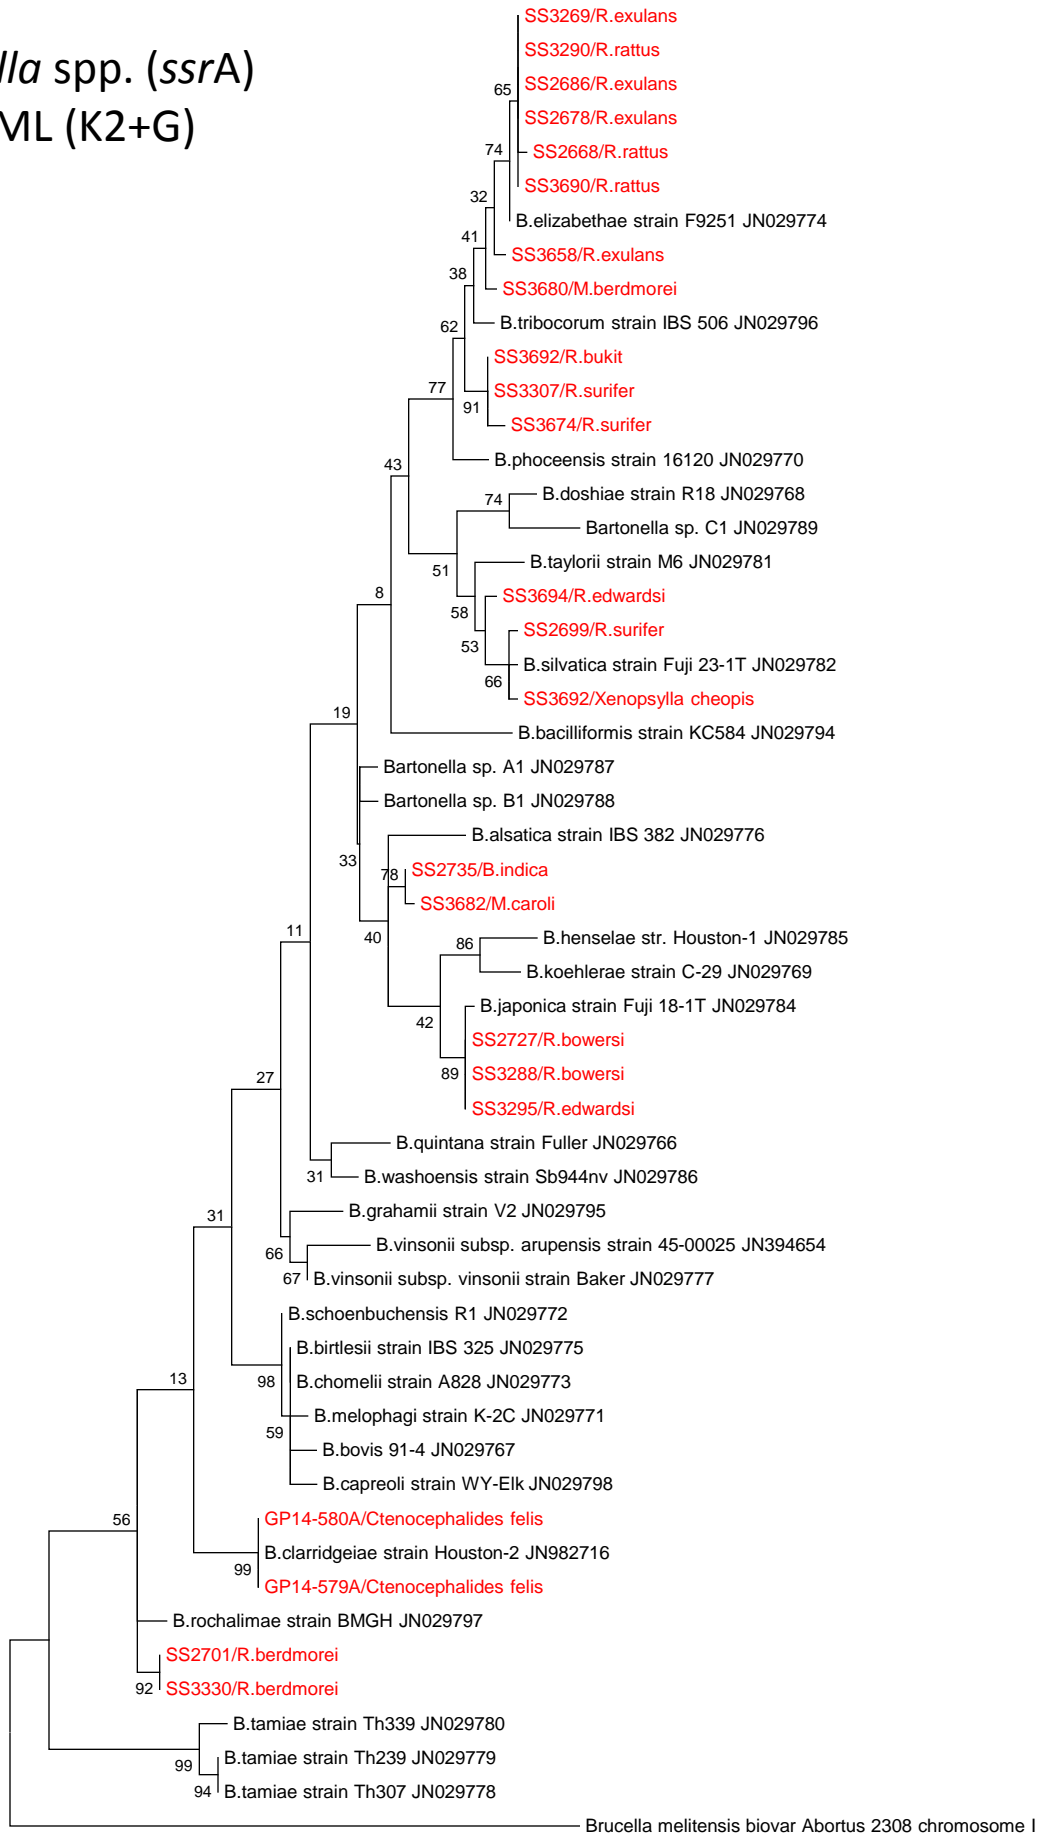

*Brucella melitensis* biovar Abortus 2308 chromosome I

0.05



*Bartonella* spp. (*gltA*)  
 Model: ML (T92+G)

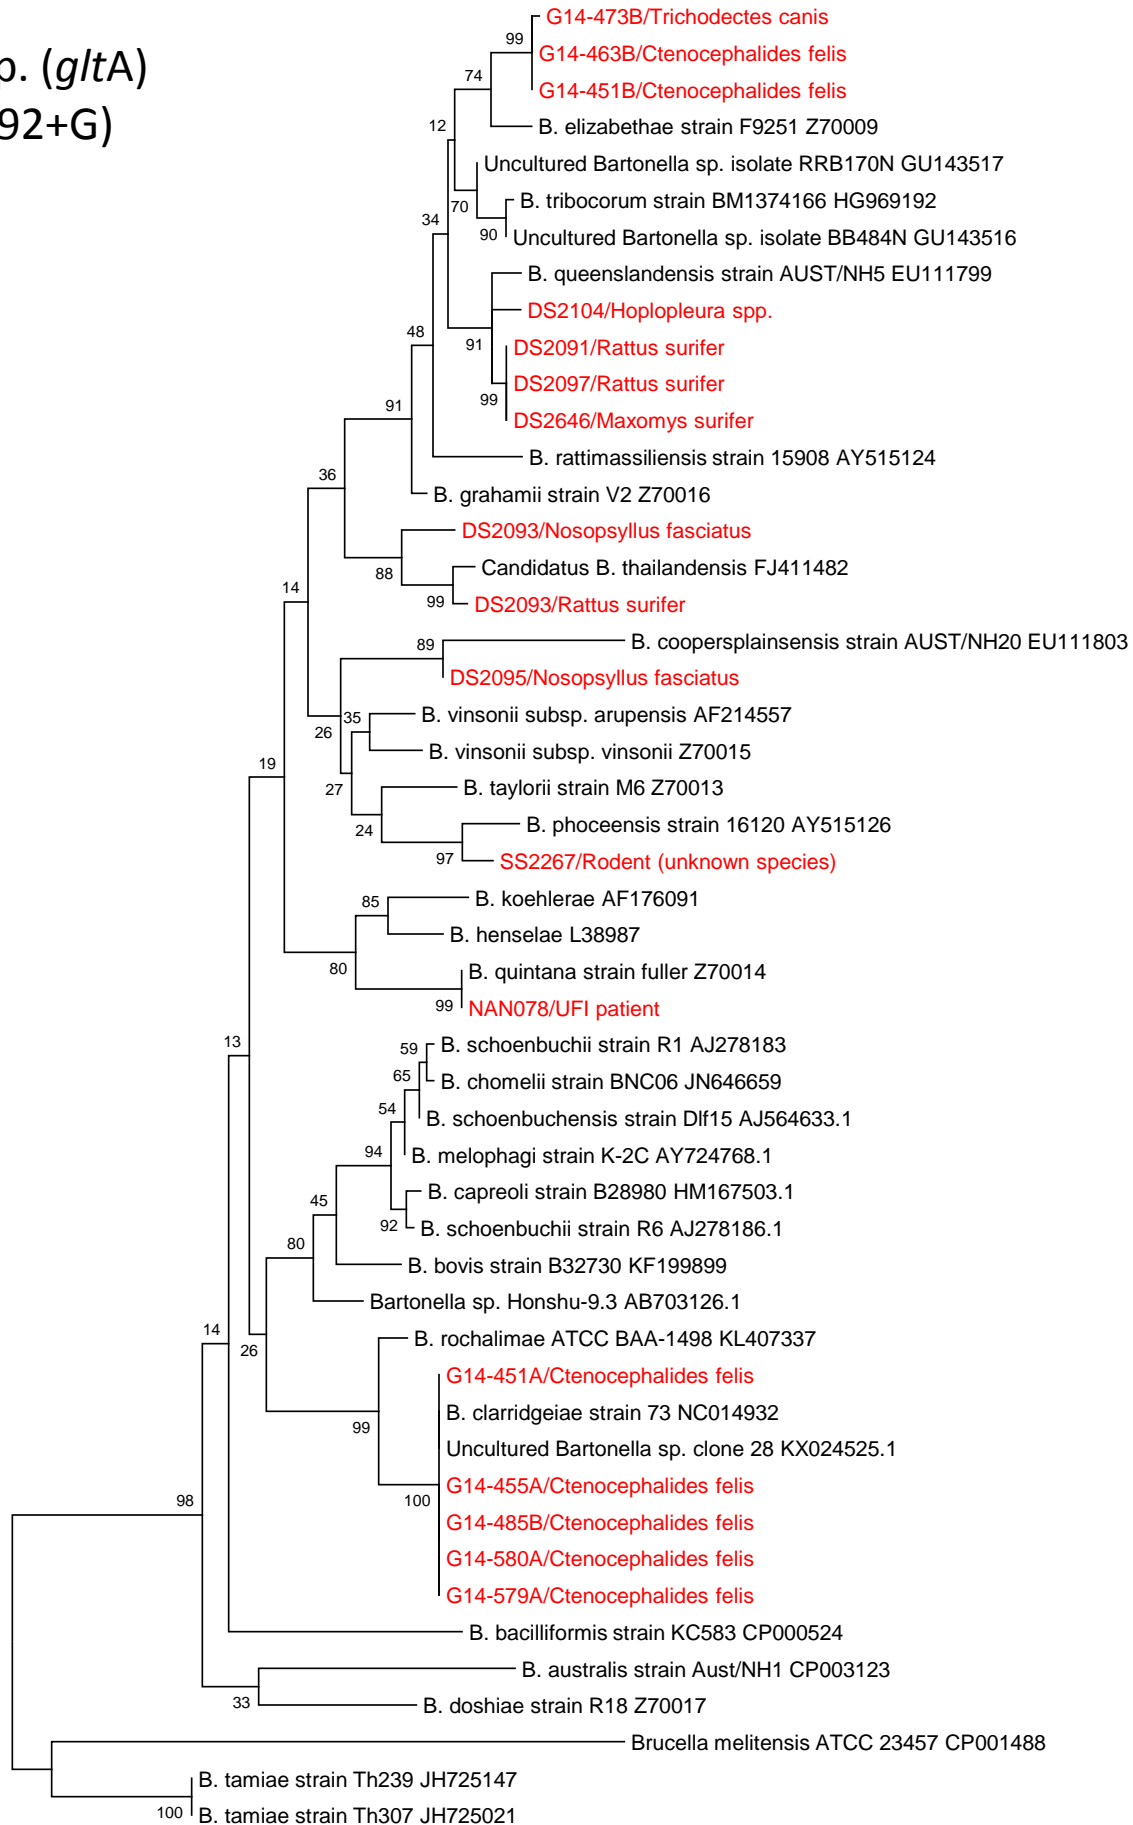

0.05

# *Bartonella* spp. (*nuoG*)

Model: ML (T92+G)

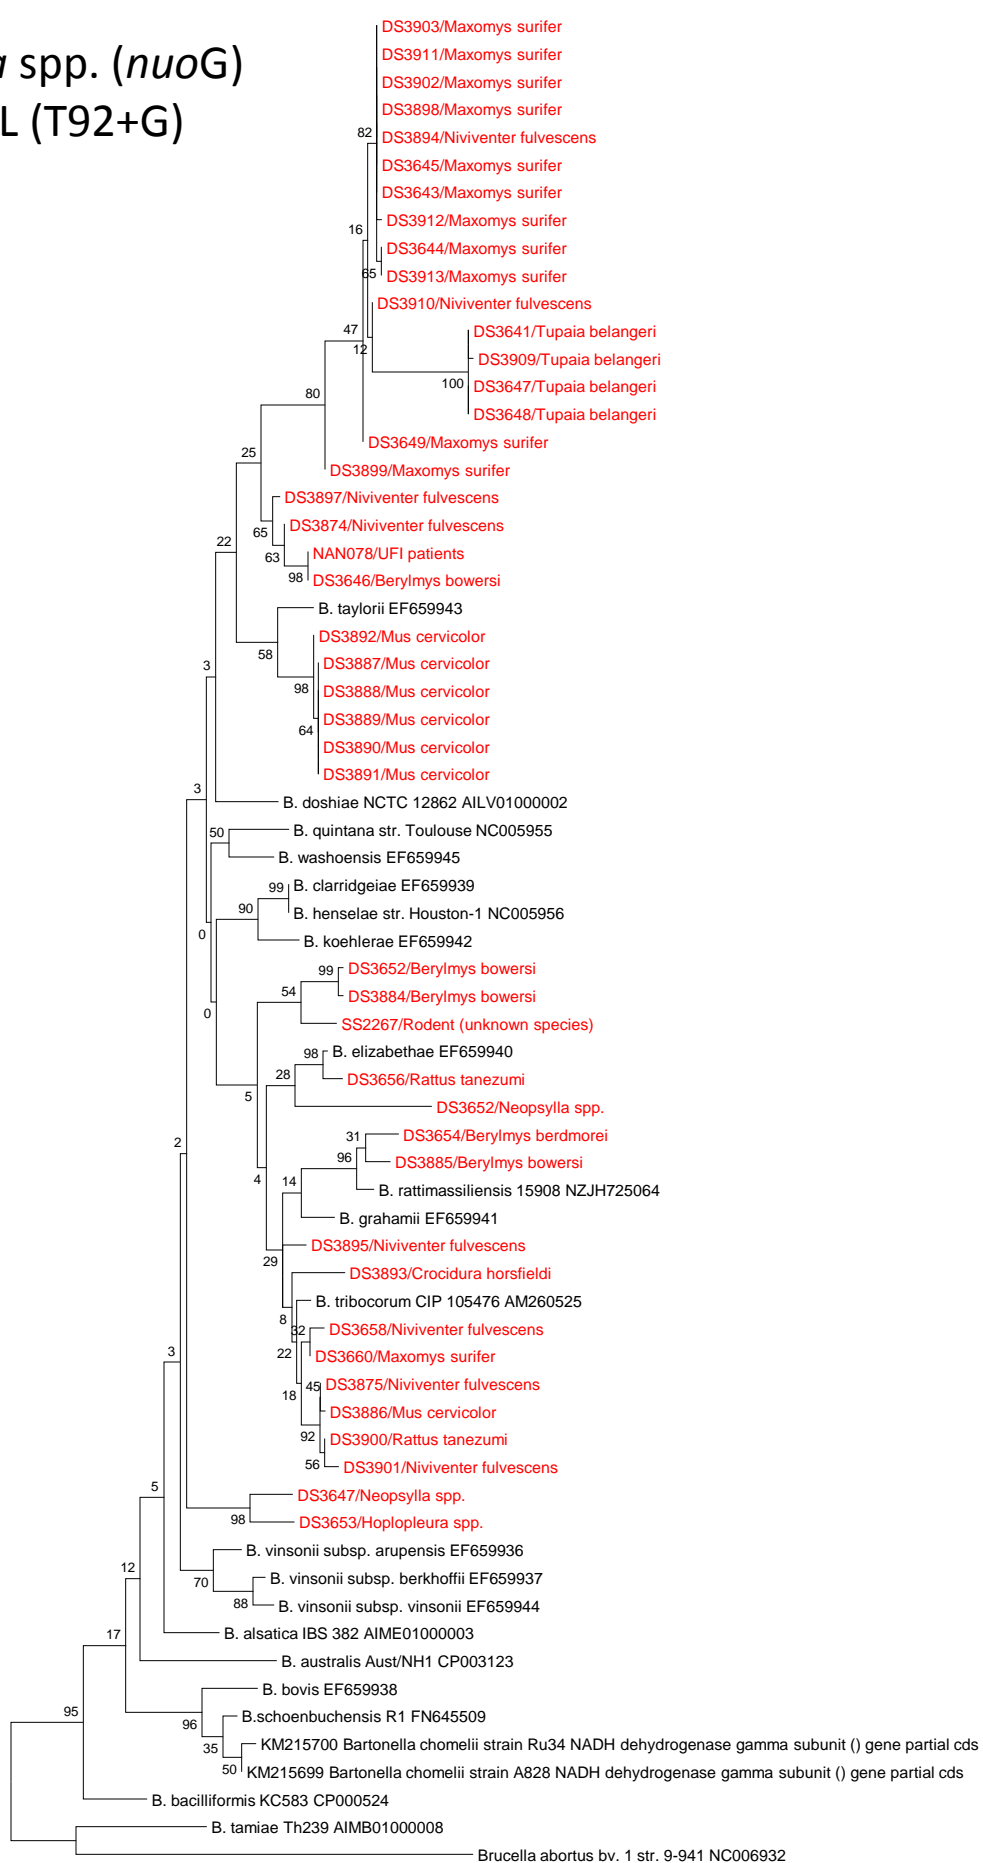

0.05

# *Rickettsia* spp. (*gltA*)

Model: ML(T92+G)

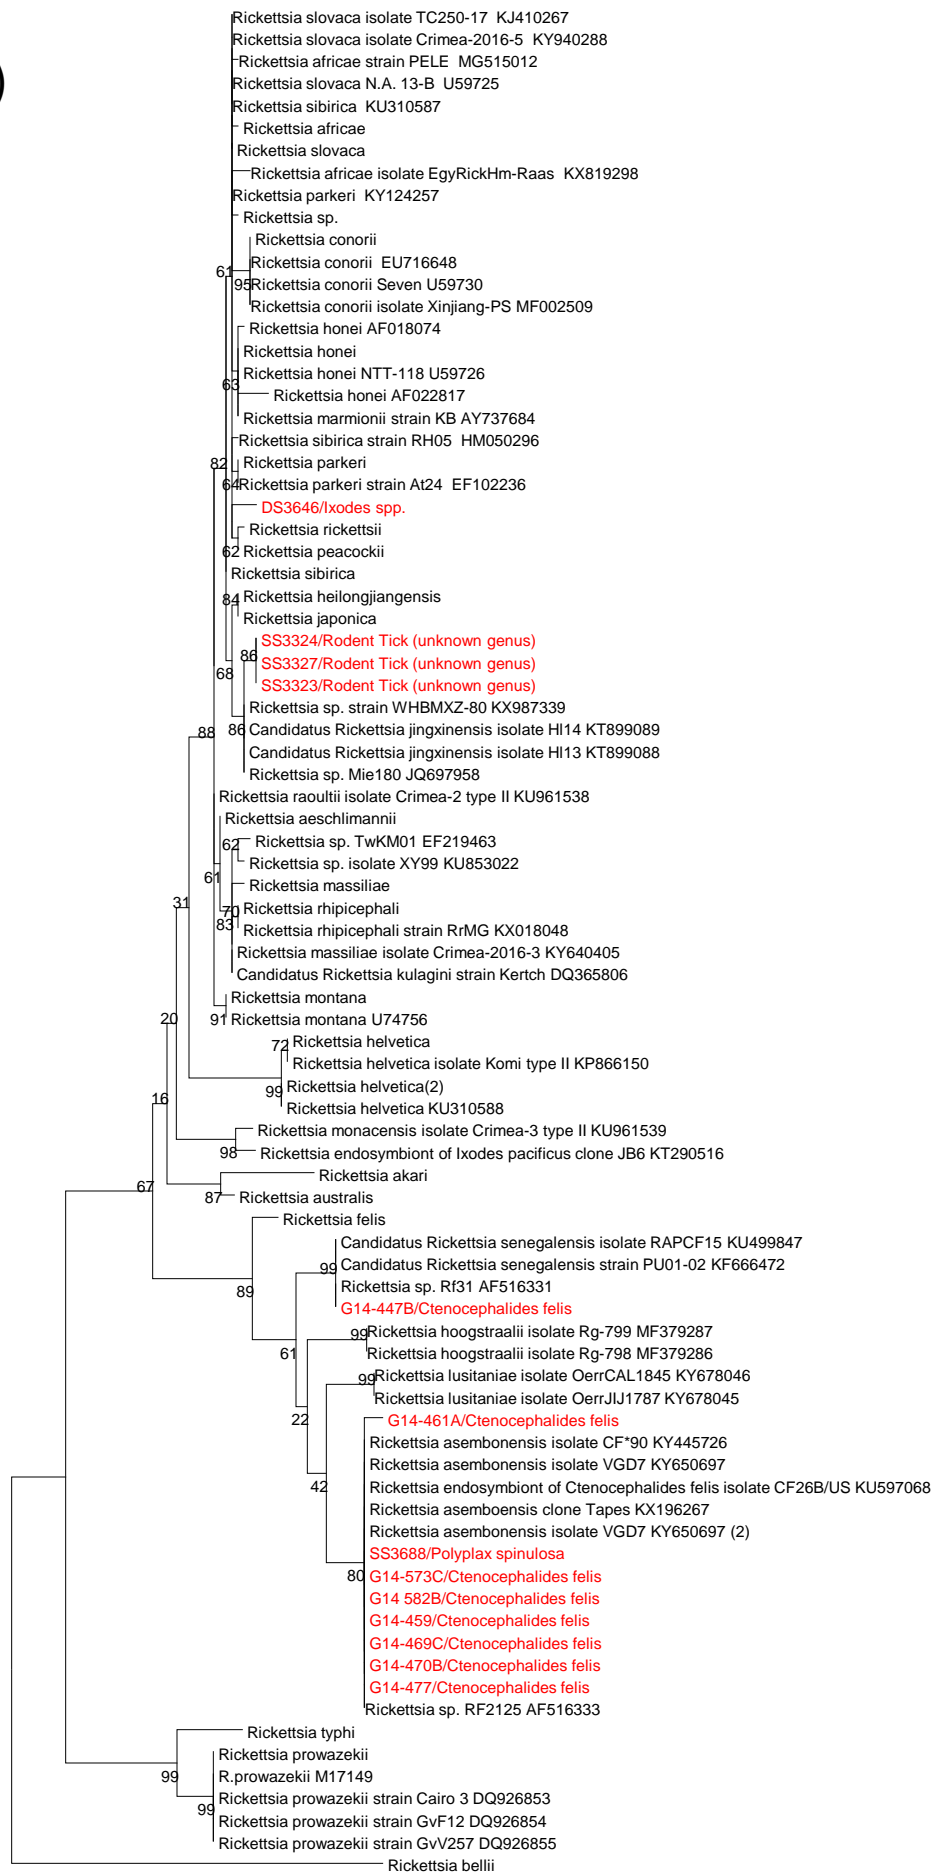

Supplement: Data_Sheet_2.pdf [file Data_Sheet_2.pdf]
