# Supplementary material for: Metagenomic Approach to Characterizing Disease Epidemiology in a Disease-Endemic Environment in Northern Thailand
Source: Front Microbiol. 2019 Feb 26;10:319. doi: 10.3389/fmicb.2019.00319 (PMC6399164; doi:10.3389/fmicb.2019.00319)
Supplement: Supplementary file 3 [file Table_1.XLSX]

## Sheet: Table S1
Table S1. Conditions, primer&probe sequences, and references for real-time PCR and PCR procedures in confirmatory assays.
Pathogen	Assay	Target Gene	Product size (bp)	Assay type	Primer & probe name	Primer & Probe sequence (5'-->3')	Primer & Probes Concentration (uM)	MgCl2 Concentration (mM)	Annealing Temperature	Reference
Anaplasma spp. Ehrlichia spp. Neoehrlichia spp. Neorickettsia spp.	Confirmation and Characterization	16S	345	PCR	AE spp-16S rDNA-F	GGTACCYACAGAAGAAGTCC	0.2	1.75	52	(Pereira et al., 2018)
					AE spp-16S rDNA-R	TAGCACTCATCGTTTACAGC	0.2
Anaplasma spp.	Characterization	groEL	600	PCR	AE-groEL-F	ACTGATGGTATGCARTTTGAYCG	0.2	1.75	52	(Pereira et al., 2018)
					AE-groEL-R	TCTTTRCGTTCYTTMACYTCAACTTC	0.2
Bartonella spp.	Confirmation	ssrA	301	Real-time PCR	ssrA-F	GCTATGGTAATAAATGGACAATGAAATAA	0.2	3	60	(Diaz et al., 2012)
					ssrA-R	GCTTCTGTTGCCAGGTG	0.2
					ssrA-probe	FAM-ACCCCGCTTAAACCTGCGACG-BHQ1	0.2
Bartonella spp.	Characterization	ssrA	301	PCR	ssrA-F	GCTATGGTAATAAATGGACAATGAAATAA	0.4	1.5	60
					ssrA-R	GCTTCTGTTGCCAGGTG	0.4
		gltA	768	Nested-PCR (nPCR)	CS443-F	GCTATGTCTGCATTCTATCA	0.5	2.5	52	(Billeter et al., 2011)
					CS1210-R	GATCYTCAATCATTTCTTTCCA	0.5
		gltA (Nested)	340		gltA-F	GGGGACCAGCTCATGGTGG	0.3	2	55	(Norman et al., 1995)
					gltA-R	AATGCAAAAAGAACAGTAAACA	0.3
		nuoG	346	PCR	nuoG-F	GGCGTGATTGTTCTCGTTA	0.2	1	55	(Colborn et al., 2010)
					nuoG-R	CACGACCACGGCTATCAAT	0.2
Borrelia spp.	Confirmation	16S	148	PCR	Bor 16S 3F	AGCCTTTAAAGCTTCGCTTGTAG	0.2	3	60	(Parola et al., 2011)
					Bor 16S 3R	GCCTCCCGTAGGAGTCTGG	0.2
					Bor 16S 3P	6FAM-CCGGCCTGAGAGGGTGAACGG-BHQ1	0.2
Borrelia spp. (Lyme diseases group)	Confirmation	Flagellin	155	Real-time PCR	Fla F1A	AGCAAATTTAGGTGCTTTCCAA	0.2	3	60	(Schwaiger et al., 2001)
					Fla R1	GCAATCATTGCCATTGCAGA	0.2
					Fla Probe1	6FAM-TGCTACAACCTCATCTGTCATTGTAGCATCTTTTATTTG-BHQ1	0.2
Borrelia spp.	Characterization	16S	1427	nPCR	B1	CAG TGC GTC TTA AGC ATG C	0.5	1	56	(Park et al., 2004)
					B8	CCT TAA ATA CCT TCC TCC C	0.5
		16S (Nested)	714		B3	GCA GCT AAG AAT CTT CCG CAA TGG	0.5	1	59
					B6	CAA CCA TGC AGC ACC TGT ATA T	0.5
		flaB	819	nPCR	FLA120F	AGAATTAATMGHGCWTCTGATGATG	0.3	1.5	54	(Scoles et al., 2001)
					Fla920R	TGCYACAAYHTCATCTGTCATT	0.3
		flaB (Nested)	354		FlaLS	AACAGCTGAAGAGCTTGGAATG	0.3	1.5	58	(Barbour et al., 1996)
					FlaRS	CTTTGATCACTTATCATTCTAATAGC	0.3
Coxiella burnetii	Confirmation	IS1111	294	Real-time PCR	Cox-F	GTCTTAAGGTGGGCTGCGTG	0.3	3	60	(Klee et al., 2006)
					Cox-R	CCCCGAATCTCATTGATCAGC	0.3
					Cox-TM	FAM- AGCGAACCATTGGTATCGGACGTTTATGG-TAMRA	0.2
Coxeilla Endosymbiont	Confirmation and Characterization	16S	500	PCR	Cox sp434f	CCTTTTGAGCGTTGACGTTA	0.2	2.5	63	(Lalzar et al., 2012)
					Cox sp1004r	CCAAAGGCACCAAGTCATTT	0.2
Francisella spp.	Confirmation and Characterization	tipA	484	PCR	tpiA-F	TGG TCA TTC TGA GAG AAG ATC	0.2		52	(Takhampunya et al., 2017)
					tpiA-R	CGT ACA TAT CTT GTT TGC TTG	0.2
	Confirmation and Characterization	16S	1128	PCR	Fr153F0.1	GCCCATTTGAGGGGGATACC	0.2	1.5	60	(Barns et al., 2005)
					Fr1281R0.1	GGACTAAGAGTACCTTTTTGAGT	0.2
Leptospira spp.	Confirmation	16S	131	Real-time PCR	LPS-F	GTAATCGCTGAAATGGGAGTTC	0.2	3	60	(Ahmed et al., 2009)
					LPS-R	ATCAAACCAATGTGGCATTG	0.2
					LPS-TM probe	FAM-ATGATTTCCCCAACAGGCGAAATC-TAMRA	0.2
Leptospira spp.	Characterization	gyrB	506	PCR	gyrB-F	TGAGCCAAGAAGAAACAAGCTACA	0.5	1.5	58	(Slack et al., 2006)
					gyrB-504r	KATGGTTCCYCTTTCYGAAGA	0.5
		16S	1505	nPCR	fD1	AGAGTTTGATCCTGGCTCAG	0.2	1.5	55	(Ganoza et al., 2010)
					rD1	AAGGAGGTGATCCAGCC	0.2
		16S (Nested)	1328		lepto16S11f	GGCGGCGCGTCTTAAACATGC	0.2	1.5	60
					lepto16S1338r	TGTGTACAAGGTCCGGGAAC	0.2
O. tsutsugamushi	Confirmation	47 kDa	117	Real-time PCR	OtsuFP630	AACTGATTTTATTCAAACTAATGCTGCT	0.2	3	60	(Jiang et al., 2004)
					OtsuRP747	TATGCCTGAGTAAGATACRTGAATRGAATT	0.2
					OtsuPR665 probe	FAM-TGGGTAGCTTTGGTGGACCGATGTTTAATCT-TAMRA	0.2
O. tsutsugamushi	Characterization	56 kDa	800	nPCR	RTS-8	AGGATTAGAGTGTGGTCCTT	0.2	2.5	55	(Horinouchi et al., 1996)
					RTS-9	ACAGATGCACTATTAGGCAA	0.2
		56 kDa (Nested)	600		RTS-6	GTTGGAGGAATGATTACTGG	0.2	2.5	55
					RTS-7	AGCGCTAGGTTTATTAGCAT	0.2
Rickettsia spp.	Confirmation	17 kDa	111	Real-time PCR	R17K 238R	CCT ACA CCT ACT CCV ACA AG	0.1	3	60	(Wright et al., 2011)
					R17K128F2	GGG CGG TAT GAA YAA ACA AG	0.1
					R17Kprobe	FAM -CCG AAT TGA GAA CCA AGT AAT GC- TAMRA	0.1
Rickettsia spp.	Characterization	gltA	850	PCR	RpCS.409d	CCT ATG GCT ATT ATG CTT GC	0.2	2.5	55	(Chmielewski et al., 2009
					RpCS.1258n	ATT GCA AAA AGT ACA GTG AAC A	0.2
