# Supplementary material for: Metagenomic Approach to Characterizing Disease Epidemiology in a Disease-Endemic Environment in Northern Thailand
Source: Front Microbiol. 2019 Feb 26;10:319. doi: 10.3389/fmicb.2019.00319 (PMC6399164; doi:10.3389/fmicb.2019.00319)
Supplement: Supplementary file 4 [file Table_2.xlsx]

## Sheet: TableS2
Table S2. The NGS pooling strategy for each sample type.
NGS Pool ID (ENTOAF No.)	Sample Type	Season	Date of collection	No. of sample per NGS pool	Sex	Age group	Genus/Species	Host types (genus/species)	Stage (ectoparasites)	Location (Sub-district)	Location (District)
ENTOAF017	Rodent Chigger	Dry	2018-01-01	2	na	na	na	Berylmys berdmorei	na	Bo Kluea Tai	Bo Kluea
ENTOAF018	Rodent Chigger	Dry	2018-01-01	2	na	na	na	Berylmys bowersi	na	Bo Kluea Tai	Bo Kluea
ENTOAF019	Rodent Chigger	Dry	2018-01-01	6	na	na	na	Maxomys surifer	na	Bo Kluea Tai	Bo Kluea
ENTOAF020	Rodent Chigger	Dry	2018-01-01	1	na	na	na	Mus cervicolor	na	Bo Kluea Tai	Bo Kluea
ENTOAF021	Rodent Chigger	Dry	2018-01-01	3	na	na	na	Niviventer fulvescens	na	Bo Kluea Tai	Bo Kluea
ENTOAF022	Rodent Chigger	Dry	2018-01-01	4	na	na	na	Rattus tanezumi	na	Bo Kluea Tai	Bo Kluea
ENTOAF023	Rodent Chigger	Dry	2018-01-01	4	na	na	na	Tupaia belangeri	na	Bo Kluea Tai	Bo Kluea
ENTOAF167	Rodent Chigger	Dry	2018-03-01	5	na	na	na	Niviventer (3), Maxomys (2)	na	Phu Fa	Bo Kluea
ENTOAF168	Rodent Chigger	Dry	2018-03-01	3	na	na	na	Rattus spp.	na	Phu Fa	Bo Kluea
ENTOAF169	Rodent Chigger	Dry	2018-03-01	3	na	na	na	Berylmys spp.	na	Phu Fa	Bo Kluea
ENTOAF170	Rodent Chigger	Dry	2018-03-01	1	na	na	na	Tupaia belangeri	na	Phu Fa	Bo Kluea
ENTOAF172	Rodent Chigger	Dry	2018-03-01	8	na	na	na	Maxomys surifer	na	Bo Kluea Tai	Bo Kluea
ENTOAF173	Rodent Chigger	Dry	2018-03-01	7	na	na	na	Mus cervicolor	na	Bo Kluea Tai	Bo Kluea
ENTOAF174	Rodent Chigger	Dry	2018-03-01	8	na	na	na	Niviventer fulvescens	na	Bo Kluea Tai	Bo Kluea
ENTOAF175	Rodent Chigger	Dry	2018-03-01	4	na	na	na	Rattus tanezumi	na	Bo Kluea Tai	Bo Kluea
ENTOAF231	Rodent Chigger	Dry	2014-01-01	4	na	na	na	Rattus rattus	na	Nong Daeng	Mae Charim
ENTOAF232	Rodent Chigger	Dry	2014-01-01	9	na	na	na	Rattus spp.	na	Nam Phang	Mae Charim
ENTOAF233	Rodent Chigger	Dry	2014-01-01	2	na	na	na	Bandicota indica	na	Nong Daeng	Mae Charim
ENTOAF234	Rodent Chigger	Dry	2014-01-01	2	na	na	na	Mus caroli	na	Nong Daeng	Mae Charim
ENTOAF235	Rodent Chigger	Dry	2014-01-01	2	na	na	na	Tupaia glis	na	Nong Daeng	Mae Charim
ENTOAF236	Rodent Chigger	Dry	2017-01-01	4	na	na	na	Rattus spp.	na	Bo Kluea Tai	Bo Kluea
ENTOAF237	Rodent Chigger	Dry	2017-01-01	1	na	na	na	Chiromyscus chiropus	na	Bo Kluea Tai	Bo Kluea
ENTOAF238	Rodent Chigger	Wet	2014-06-01	6	na	na	na	Menetes berdmorei	na	Nam Phang	Mae Charim
ENTOAF239	Rodent Chigger	Wet	2014-06-01	8	na	na	na	Rattus rattus	na	Nam Phang	Mae Charim
ENTOAF240	Rodent Chigger	Wet	2014-06-01	9	na	na	na	Rattus spp.	na	Nam Phang	Mae Charim
ENTOAF241	Rodent Chigger	Wet	2017-06-01	7	na	na	na	Tupaia glis	na	Nam Phang	Mae Charim
ENTOAF242	Rodent Chigger	Wet	2017-06-01	2	na	na	na	Berymys berdmorei	na	Bo Kluea Tai	Bo Kluea
ENTOAF243	Rodent Chigger	Wet	2017-06-01	1	na	na	na	Berymys berdmorei	na	Bo Kluea Tai	Bo Kluea
ENTOAF244	Rodent Chigger	Wet	2017-06-01	2	na	na	na	Berymys berdmorei	na	Bo Kluea Tai	Bo Kluea
ENTOAF245	Rodent Chigger	Wet	2017-06-01	1	na	na	na	Berymys berdmorei	na	Bo Kluea Tai	Bo Kluea
ENTOAF246	Rodent Chigger	Wet	2017-06-01	2	na	na	na	Maxomys surifer	na	Bo Kluea Tai	Bo Kluea
ENTOAF247	Rodent Chigger	Wet	2017-06-01	2	na	na	na	Niviventer fulvescens	na	Bo Kluea Tai	Bo Kluea
ENTOAF248	Rodent Chigger	Wet	2017-06-01	2	na	na	na	Tupaia belangeri	na	Bo Kluea Tai	Bo Kluea
ENTOAF336	Rodent Chigger	Wet	2014-06-01	12	na	na	na	Bandicota spp.	na	Tha Nao	Phu Phiang
ENTOAF337	Rodent Chigger	Wet	2014-09-01	6	na	na	na	Menetes berdmorei	na	Nam Phang	Mae Charim
ENTOAF338	Rodent Chigger	Wet	2014-09-01	11	na	na	na	Rattus spp.	na	Nam Phang	Mae Charim
ENTOAF339	Rodent Chigger	Wet	2014-09-01	12	na	na	na	Rattus rattus	na	Nam Phang	Mae Charim
ENTOAF340	Rodent Chigger	Wet	2014-09-01	3	na	na	na	Rattus surifer	na	Nam Phang	Mae Charim
ENTOAF341	Rodent Chigger	Wet	2014-09-01	5	na	na	na	Tupaia glis	na	Nam Phang	Mae Charim
ENTOAF342	Rodent Chigger	Dry	2017-01-01	4	na	na	na	Hylomys suillus	na	Bo Kluea Tai	Bo Kluea
ENTOAF343	Rodent Chigger	Dry	2017-01-01	8	na	na	na	Rattus spp.	na	Bo Kluea Tai	Bo Kluea
ENTOAF344	Rodent Chigger	Dry	2017-01-01	8	na	na	na	Rattus spp.	na	Bo Kluea Tai	Bo Kluea
ENTOAF345	Rodent Chigger	Dry	2017-01-01	3	na	na	na	Tupaia glis	na	Bo Kluea Tai	Bo Kluea
ENTOAF305	Healthy Blood Control			10
ENTOAF179	Mammal flea	Dry	2014-01-01	1			Ctenocephalides felis	Dog	female		Mae Charim
ENTOAF180	Mammal flea	Dry	2014-01-01	1			Ctenocephalides felis	Dog	female		Mae Charim
ENTOAF185	Mammal flea	Dry	2014-01-01	10			Ctenocephalides felis	Dog	male		Mae Charim
ENTOAF186	Mammal flea	Dry	2014-01-01	11			Ctenocephalides felis	Dog	male		Mae Charim
ENTOAF187	Mammal flea	Dry	2014-01-01	10			Ctenocephalides felis	Dog	female		Mae Charim
ENTOAF188	Mammal flea	Dry	2014-01-01	11			Ctenocephalides felis	Dog	female		Mae Charim
ENTOAF347	Mammal flea	Dry	2014-01-01	8			Ctenocephalides felis	Dog	Male		Mae Charim
ENTOAF348	Mammal flea	Dry	2014-01-01	9			Ctenocephalides felis	Dog	Male		Mae Charim
ENTOAF349	Mammal flea	Dry	2014-01-01	11			Ctenocephalides felis	Dog	Female		Mae Charim
ENTOAF350	Mammal flea	Dry	2014-01-01	10			Ctenocephalides felis	Dog	Female		Mae Charim
ENTOAF351	Mammal flea	Dry	2014-01-01	2			Echinophaga gallinacea	Dog	Male		Mae Charim
ENTOAF352	Mammal flea	Dry	2014-01-01	4			Echinophaga gallinacea	Dog	Female		Mae Charim
ENTOAF189	Mammal Louse	Dry	2014-01-01	2			Trichodectes canis	Dog	Male		Mae Charim
ENTOAF190	Mammal Louse	Dry	2014-01-01	4			Trichodectes canis	Dog	female		Mae Charim
ENTOAF360	Mammal Louse	Dry	2014-01-01	2			Trichodectes canis	Dog	Male		Mae Charim
ENTOAF361	Mammal Louse	Dry	2014-01-01	4			Trichodectes canis	Dog	female		Mae Charim
ENTOAF181	Mammal Tick	Dry	2014-01-01	1			Boophilus microplus	Cow	Female		Mae Charim
ENTOAF182	Mammal Tick	Dry	2014-01-01	1			Boophilus microplus	Cow	male		Mae Charim
ENTOAF183	Mammal Tick	Dry	2014-01-01	10			Rhipicephalus sanguineus	Dog	male		Mae Charim
ENTOAF184	Mammal Tick	Dry	2014-01-01	4			Rhipicephalus sanguineus	Dog	Female		Mae Charim
ENTOAF354	Mammal Tick	Dry	2014-01-01	2			Rhipicephalus sanguineus	Dog	male		Mae Charim
ENTOAF355	Mammal Tick	Dry	2014-02-01	13			Rhipicephalus sanguineus	Dog	male		Mae Charim
ENTOAF356	Mammal Tick	Dry	2014-01-01	1			Rhipicephalus sanguineus	Dog	female		Mae Charim
ENTOAF357	Mammal Tick	Wet	2014-09-01	3			Rhipicephalus sanguineus	Dog	female		Mae Charim
ENTOAF001	UFI Patient	na	Oct-Nov 2017	4	Male	8-19	na	na	na		Bo Kluea Hosp
ENTOAF002	UFI Patient	na	Oct-Nov 2017	11	Male	20-39	na	na	na		Bo Kluea Hosp
ENTOAF003	UFI Patient	na	Oct-Nov 2017	13	Male	40-49	na	na	na		Bo Kluea Hosp
ENTOAF004	UFI Patient	na	Oct-Nov 2017	9	Male	50 -83	na	na	na		Bo Kluea Hosp
ENTOAF005	UFI Patient	na	Oct-Nov 2017	4	Female	8-19	na	na	na		Bo Kluea Hosp
ENTOAF006	UFI Patient	na	Oct-Nov 2017	7	Female	20-39	na	na	na		Bo Kluea Hosp
ENTOAF007	UFI Patient	na	Oct-Nov 2017	5	Female	40-49	na	na	na		Bo Kluea Hosp
ENTOAF008	UFI Patient	na	Oct-Nov 2017	9	Female	50-55	na	na	na		Bo Kluea Hosp
ENTOAF009	UFI Patient	na	Oct-Nov 2017	8	Female	56-72	na	na	na		Bo Kluea Hosp
ENTOAF291	UFI Patient	na	Feb, Mar, Apr, Sep 2017	11	Male	8-19	na	na	na		Bo Kluea Hosp
ENTOAF292	UFI Patient	na	Feb, Mar 2017	10	Male	20-39	na	na	na		Bo Kluea Hosp
ENTOAF293	UFI Patient	na	Mar, Apr, Sep 2017	9	Male	20-39	na	na	na		Bo Kluea Hosp
ENTOAF294	UFI Patient	na	Feb, Apr, Sep 2017	8	Male	40-49	na	na	na		Bo Kluea Hosp
ENTOAF295	UFI Patient	na	Feb, Mar 2017	9	Male	50-62	na	na	na		Bo Kluea Hosp
ENTOAF296	UFI Patient	na	Apr, Sep 2017	11	Male	50-61	na	na	na		Bo Kluea Hosp
ENTOAF297	UFI Patient	na	Feb, Apr, Sep 2017	4	Male	65-80	na	na	na		Bo Kluea Hosp
ENTOAF298	UFI Patient	na	Apr, Sep 2017	4	Female	8-19	na	na	na		Bo Kluea Hosp
ENTOAF299	UFI Patient	na	Feb, Mar 2017	9	Female	20-39	na	na	na		Bo Kluea Hosp
ENTOAF300	UFI Patient	na	Apr, Sep 2017	9	Female	20-39	na	na	na		Bo Kluea Hosp
ENTOAF301	UFI Patient	na	Feb, Mar, Apr 2017	11	Female	40-49	na	na	na		Bo Kluea Hosp
ENTOAF302	UFI Patient	na	Feb, Mar, Apr 2017	11	Female	50-60	na	na	na		Bo Kluea Hosp
ENTOAF303	UFI Patient	na	Apr, Sep 2017	10	Female	50-60	na	na	na		Bo Kluea Hosp
ENTOAF304	UFI Patient	na	Feb, Mar, Apr, Sep 2017	14	Female	61-89	na	na	na		Bo Kluea Hosp
ENTOAF128	Rodent	Dry	2018-03-01	3	Male/Female	na	Mus spp.	na	na	Phu Fa	Bo Kluea
ENTOAF129	Rodent	Dry	2018-03-01	5	Male/Female	na	Niviventer (3), Maxomys (2)	na	na	Phu Fa	Bo Kluea
ENTOAF130	Rodent	Dry	2018-03-01	3	Male/Female	na	Rattus spp.	na	na	Phu Fa	Bo Kluea
ENTOAF131	Rodent	Dry	2018-03-01	3	Male/Female	na	Berylmys spp.	na	na	Phu Fa	Bo Kluea
ENTOAF132	Rodent	Dry	2018-03-01	1	Female	na	Tupaia belangeri	na	na	Phu Fa	Bo Kluea
ENTOAF133	Rodent	Dry	2018-03-01	1	Female	na	Crocidura horsfieldi	na	na	Phu Fa	Bo Kluea
ENTOAF134	Rodent	Dry	2018-03-01	8	Male/Female	na	Maxomys surifer	na	na	Bo Kluea Tai	Bo Kluea
ENTOAF135	Rodent	Dry	2018-03-01	7	Male/Female	na	Mus cervicolor	na	na	Bo Kluea Tai	Bo Kluea
ENTOAF136	Rodent	Dry	2018-03-01	8	Male/Female	na	Niviventer fulvescens	na	na	Bo Kluea Tai	Bo Kluea
ENTOAF137	Rodent	Dry	2018-03-01	4	Male/Female	na	Rattus tanezumi	na	na	Bo Kluea Tai	Bo Kluea
ENTOAF195	Rodent	Wet	2013-08-01	5	Male/Female	na	Unknown	na	na		Nan
ENTOAF196	Rodent	Dry	2014-01-01	10	Female	na	Rattus exulans	na	na		Mae Charim
ENTOAF197	Rodent	Dry	2014-01-01	10	Female	na	Rattus exulans	na	na		Mae Charim
ENTOAF198	Rodent	Dry	2014-01-01	6	Female	na	Rattus exulans	na	na		Mae Charim
ENTOAF199	Rodent	Dry	2014-01-01	10	male	na	Rattus exulans	na	na		Mae Charim
ENTOAF200	Rodent	Dry	2014-01-01	10	male	na	Rattus exulans	na	na		Mae Charim
ENTOAF201	Rodent	Dry	2014-01-01	7	male	na	Rattus exulans	na	na		Mae Charim
ENTOAF202	Rodent	Dry	2014-01-01	8	Male/Female	na	Rattus rattus	na	na		Mae Charim
ENTOAF203	Rodent	Dry	2014-01-01	8	Male/Female	na	Rattus surifer	na	na		Mae Charim
ENTOAF204	Rodent	Dry	2014-01-01	2	Male/Female	na	Rattus spp.	na	na		Mae Charim
ENTOAF205	Rodent	Dry	2014-01-01	4	Male/Female	na	Mus caroli	na	na		Mae Charim
ENTOAF206	Rodent	Dry	2014-01-01	2	Male/Female	na	Bandicota indica	na	na		Mae Charim
ENTOAF207	Rodent	Dry	2014-01-01	2	Male/Female	na	Tupaia glis	na	na		Mae Charim
ENTOAF208	Rodent	Wet	2014-06-01	10	Male/Female	na	Rattus exulans	na	na		Mae Charim
ENTOAF209	Rodent	Wet	2014-06-01	3	Female	na	Rattus rattus	na	na		Mae Charim
ENTOAF210	Rodent	Wet	2014-06-01	1	male	na	Rattus bukit	na	na		Mae Charim
ENTOAF211	Rodent	Dry	2017-01-01	4	male	na	Rattus bowersi	na	na	Bo Kluea Tai	Bo Kluea
ENTOAF212	Rodent	Dry	2017-01-01	6	Male/Female	na	Rattus bukit	na	na	Bo Kluea Tai	Bo Kluea
ENTOAF213	Rodent	Dry	2017-01-01	5	Male/Female	na	Rattus tanezumi	na	na	Bo Kluea Tai	Bo Kluea
ENTOAF214	Rodent	Dry	2017-01-01	1	male	na	Chiromyscus chiropus	na	na	Bo Kluea Tai	Bo Kluea
ENTOAF215	Rodent	Dry	2017-01-01	1	male	na	Crocidura fuliginosa	na	na	Bo Kluea Tai	Bo Kluea
ENTOAF216	Rodent	Dry	2017-01-01	3	Male/Female	na	Hylomys suillus	na	na	Bo Kluea Tai	Bo Kluea
ENTOAF217	Rodent	Dry	2017-01-01	1	male	na	Menates berdmorei	na	na	Bo Kluea Tai	Bo Kluea
ENTOAF218	Rodent	Dry	2017-01-01	2	Female	na	Rattus spp.	na	na	Bo Kluea Tai	Bo Kluea
ENTOAF219	Rodent	Dry	2017-01-01	6	Male/Female	na	Rattus surifer	na	na	Bo Kluea Tai	Bo Kluea
ENTOAF220	Rodent	Dry	2017-01-01	3	Male/Female	na	Tupaia glis	na	na	Bo Kluea Tai	Bo Kluea
ENTOAF221	Rodent	Wet	2017-06-01	6	Male/Female	na	Berylmys berdmorei	na	na	Bo Kluea Tai	Bo Kluea
ENTOAF222	Rodent	Wet	2017-06-01	2	Female	na	Maxomys surifer	na	na	Bo Kluea Tai	Bo Kluea
ENTOAF223	Rodent	Wet	2017-06-01	2	Female	na	Niviventer fulvescens	na	na	Bo Kluea Tai	Bo Kluea
ENTOAF224	Rodent	Wet	2017-06-01	2	Female	na	Rattus nitidus	na	na	Bo Kluea Tai	Bo Kluea
ENTOAF225	Rodent	Wet	2017-06-01	3	male	na	Rattus tanezumi	na	na	Bo Kluea Tai	Bo Kluea
ENTOAF226	Rodent	Wet	2017-06-01	3	Female	na	Tupaia belangeri	na	na	Bo Kluea Tai	Bo Kluea
ENTOAF311	Rodent	Wet	2014-06-01	13	Male/Female	na	Menetes berdmorei	na	na	Nam Phang	Mae Charim
ENTOAF312	Rodent	Wet	2014-09-01	1	Female	na	Mus caroli	na	na	Nam Phang	Mae Charim
ENTOAF313	Rodent	Wet	2014-09-01	1	Female	na	Rattus berdmorei	na	na	Nam Phang	Mae Charim
ENTOAF314	Rodent	Wet	2014-06-01	3	Male/Female	na	Rattus bowersi	na	na	Nam Phang	Mae Charim
ENTOAF315	Rodent	Wet	2014-09-01	3	Male/Female	na	Rattus bukit	na	na	Nam Phang	Mae Charim
ENTOAF316	Rodent	Wet	Jun,Sep 2014	7	Male/Female	na	Rattus edwardsi	na	na	Nam Phang	Mae Charim
ENTOAF317	Rodent	Wet	2014-09-01	10	Male/Female	na	Rattus exulans	na	na	Nam Phang	Mae Charim
ENTOAF318	Rodent	Wet	Jun,Sep 2014	9	male	na	Rattus rattus	na	na	Nam Phang	Mae Charim
ENTOAF319	Rodent	Wet	Jun,Sep 2014	11	Female	na	Rattus rattus	na	na	Nam Phang	Mae Charim
ENTOAF320	Rodent	Wet	Jun,Sep 2014	8	Male/Female	na	Rattus surifer	na	na	Nam Phang	Mae Charim
ENTOAF321	Rodent	Wet	Jun,Sep 2014	12	Male/Female	na	Tupaia glis	na	na	Nam Phang	Mae Charim
ENTOAF322	Rodent	Wet	2014-06-01	3	Male/Female	na	Bandicota indica	na	na	Tha Nao	Phu Phiang
ENTOAF323	Rodent	Wet	2014-06-01	8	Male/Female	na	Bandicota savilei	na	na	Tha Nao	Phu Phiang
ENTOAF324	Rodent	Wet	2014-06-01	6	Male/Female	na	Mus caroli	na	na	Tha Nao	Phu Phiang
ENTOAF325	Rodent	Wet	2014-06-01	1	Male	na	Mus cervicolor	na	na	Tha Nao	Phu Phiang
ENTOAF326	Rodent	Dry	2018-01-01	2	Male	na	Berylmys berdmorei	na	na	Bo Kluea Tai	Bo Kluea
ENTOAF327	Rodent	Dry	2018-01-01	2	Female	na	Berylmys bowersi	na	na	Bo Kluea Tai	Bo Kluea
ENTOAF328	Rodent	Dry	2018-01-01	6	Male/Female	na	Maxomys surifer	na	na	Bo Kluea Tai	Bo Kluea
ENTOAF329	Rodent	Dry	2018-01-01	1	Female	na	Mus cervicolor	na	na	Bo Kluea Tai	Bo Kluea
ENTOAF330	Rodent	Dry	2018-01-01	3	Male	na	Niviventer fulvescens	na	na	Bo Kluea Tai	Bo Kluea
ENTOAF331	Rodent	Dry	2018-01-01	5	Male/Female	na	Rattus tanezumi	na	na	Bo Kluea Tai	Bo Kluea
ENTOAF332	Rodent	Dry	2018-01-01	3	Male/Female	na	Tupaia belangeri	na	na	Bo Kluea Tai	Bo Kluea
ENTOAF258	Rodent Flea	Wet	2014-06-01	2	na	na	Nosopsyllus fasciatus	Rodent	Female	Bo Kluea Tai	Bo Kluea
ENTOAF270	Rodent Flea	Dry	2014-01-01	4	na	na	na	Rodent	Male	Nam Phang	Mae Charim
ENTOAF271	Rodent Flea	Dry	2014-01-01	8	na	na	na	Rodent	Female	Nam Phang	Mae Charim
ENTOAF272	Rodent Flea	Dry	2014-01-01	4	na	na	na	Rodent	male	Nong Daeng	Mae Charim
ENTOAF273	Rodent Flea	Dry	2014-01-01	1	na	na	na	Rodent	female	Nong Daeng	Mae Charim
ENTOAF274	Rodent Flea	Wet	2014-09-01	1	na	na	Xenopsylla cheopis	Rodent	female	Nam Phang	Mae Charim
ENTOAF275	Rodent Flea	Wet	2014-09-01	1	na	na	Xenopsylla cheopis	Rodent	Female	Nam Phang	Mae Charim
ENTOAF278	Rodent Flea	Dry	2018-01-01	2	na	na	Neopsylla sp.	Rodent	female	Bo Kluea Tai	Bo Kluea
ENTOAF280	Rodent Louse	Wet	2014-06-01	1	na	na	na	Rodent	Female	Tha Nao	Phu Phiang
ENTOAF281	Rodent Louse	Wet	2014-09-01	1	na	na	Polyplax spinulosa	Rodent	Female	Nam Phang	Mae Charim
ENTOAF282	Rodent Louse	Dry	2017-01-01	1	na	na	Hoplopleura sp.	Rodent	Female	Bo Kluea Tai	Bo Kluea
ENTOAF283	Rodent Louse	Dry	2018-01-01	1	na	na	Hoplopleura sp.	Rodent	Female	Bo Kluea Tai	Bo Kluea
ENTOAF251	Rodent Tick	Wet	2014-06-01	2	na	na	na	Rodent	Nymph	Tha Nao	Phu Phiang
ENTOAF252	Rodent Tick	Dry	2017-01-01	4	na	na	Ixodes sp.	Rodent	Nymph	Bo Kluea Tai	Bo Kluea
ENTOAF253	Rodent Tick	Dry	2017-01-01	4	na	na	Haemaphysalis sp.	Rodent	Nymph	Bo Kluea Tai	Bo Kluea
ENTOAF254	Rodent Tick	Dry	2018-01-01	1	na	na	Ixodes sp.	Rodent	Nymph	Bo Kluea Tai	Bo Kluea
ENTOAF255	Rodent Tick	Wet	2014-06-01	9	na	na	na	Rodent	Larva	Tha Nao	Phu Phiang
ENTOAF256	Rodent Tick	Wet	2014-09-01	7	na	na	Haemaphysalis bandicota	Rodent	Female	Nam Phang	Mae Charim
ENTOAF259	Rodent Tick	Wet	2017-06-01	4	na	na	Ixodes sp.	Rodent	Female	Bo Kluea Tai	Bo Kluea
ENTOAF260	Rodent Tick	Wet	2014-06-01	9	na	na	na	Rodent	Larva	Tha Nao	Phu Phiang
ENTOAF261	Rodent Tick	Wet	2014-06-01	1	na	na	na	Rodent	Nymph	Tha Nao	Phu Phiang
ENTOAF262	Rodent Tick	Wet	2014-06-01	1	na	na	na	Rodent	Male	Nam Phang	Mae Charim
ENTOAF263	Rodent Tick	Dry	2014-01-01	1	na	na	na	Rodent	Female	Nam Phang	Mae Charim
ENTOAF264	Rodent Tick	Wet	2014-06-01	11	na	na	na	Rodent	Female	Nam Phang	Mae Charim
ENTOAF267	Rodent Tick	Dry	2018-01-01	1	na	na	Ixodes sp.	Rodent	Nymph	Bo Kluea Tai	Bo Kluea
ENTOAF268	Rodent Tick	Dry	2018-01-01	1	na	na	Ixodes sp.	Rodent	Nymph	Bo Kluea Tai	Bo Kluea
ENTOAF269	Rodent Tick	Wet	2014-06-01	1	na	na	na	Rodent	Male	Tha Nao	Phu Phiang
ENTOAF276	Rodent Tick	Wet	2014-06-01	1	na	na	na	Rodent	Male	Nam Phang	Mae Charim
ENTOAF277	Rodent Tick	Dry	2017-01-01	1	na	na	Haemaphysalis sp.	Rodent	Nymph	Bo Kluea Tai	Bo Kluea
